# Supplementary material for: The Prognostic Potential of Cuproptosis and Cuproptosis-Related Alteration of Clear Cell Renal Cell Carcinoma
Source: Research Square preprint supplement (doi:10.21203/rs.3.rs-2009465/v1), 2022-10-10
Supplement: Supplementary file 1 [file 942cd7f183763eb5ea33c125.pdf]

A

| Training cohort    | TCGA-KIRC<br>(n = 331) |          | High risk score<br>(n = 166) |          | Low risk score<br>(n = 165) |          |
|--------------------|------------------------|----------|------------------------------|----------|-----------------------------|----------|
| Number of Patients | 531                    |          | 266                          |          | 265                         |          |
| <b>T_Stage</b>     |                        |          |                              |          |                             |          |
| T1                 | 160                    | (48.34%) | 64                           | (38.55%) | 96                          | (58.18%) |
| T2                 | 42                     | (12.69%) | 22                           | (13.25%) | 20                          | (12.12%) |
| T3                 | 120                    | (36.25%) | 71                           | (42.77%) | 49                          | (29.70%) |
| T4                 | 9                      | ( 2.72%) | 9                            | ( 5.42%) | 0                           | ( 0.00%) |
| <b>N_Stage</b>     |                        |          |                              |          |                             |          |
| N0                 | 149                    | (45.02%) | 73                           | (43.98%) | 76                          | (46.06%) |
| N1                 | 13                     | ( 3.93%) | 7                            | ( 4.22%) | 6                           | ( 3.64%) |
| NX                 | 169                    | (51.06%) | 86                           | (51.81%) | 83                          | (50.30%) |
| <b>M_Stage</b>     |                        |          |                              |          |                             |          |
| NA                 | 1                      | ( 0.30%) | 1                            | ( 0.60%) | 0                           | ( 0.00%) |
| M0                 | 262                    | (79.15%) | 123                          | (74.10%) | 139                         | (84.24%) |
| M1                 | 51                     | (15.41%) | 34                           | (20.48%) | 17                          | (10.30%) |
| MX                 | 17                     | ( 5.14%) | 8                            | ( 4.82%) | 9                           | ( 5.45%) |
| <b>Stage</b>       |                        |          |                              |          |                             |          |
| NR                 | 3                      | ( 0.91%) | 2                            | ( 1.20%) | 1                           | ( 0.61%) |
| Stage I            | 156                    | (47.13%) | 62                           | (37.35%) | 94                          | (56.97%) |
| Stage II           | 34                     | (10.27%) | 16                           | ( 9.64%) | 18                          | (10.91%) |
| Stage III          | 85                     | (25.68%) | 50                           | (30.12%) | 35                          | (21.21%) |
| Stage IV           | 53                     | (16.01%) | 36                           | (21.69%) | 17                          | (10.30%) |
| <b>OS</b>          |                        |          |                              |          |                             |          |
| Mean               | 1340.29                |          | 1191.33                      |          | 1490.15                     |          |
| median             | 1218.00                |          | 1138.50                      |          | 1314.00                     |          |
| <b>Age</b>         |                        |          |                              |          |                             |          |
| ≤60                | 160                    | (48.34%) | 81                           | (48.80%) | 79                          | (47.88%) |
| >60                | 171                    | (51.66%) | 85                           | (51.20%) | 86                          | (52.12%) |
| <b>Gender</b>      |                        |          |                              |          |                             |          |
| Female             | 114                    | (34.44%) | 49                           | (29.52%) | 65                          | (39.39%) |
| Male               | 217                    | (65.56%) | 117                          | (70.48%) | 100                         | (60.61%) |

B

| Training cohort    | TCGA-KIRC<br>(n = 331) |          | High risk score<br>(n = 166) |          | Low risk score<br>(n = 165) |          |
|--------------------|------------------------|----------|------------------------------|----------|-----------------------------|----------|
| Number of Patients | 531                    |          | 266                          |          | 265                         |          |
| <b>T_Stage</b>     |                        |          |                              |          |                             |          |
| T1                 | 160                    | (48.34%) | 64                           | (38.55%) | 96                          | (58.18%) |
| T2                 | 42                     | (12.69%) | 22                           | (13.25%) | 20                          | (12.12%) |
| T3                 | 120                    | (36.25%) | 71                           | (42.77%) | 49                          | (29.70%) |
| T4                 | 9                      | ( 2.72%) | 9                            | ( 5.42%) | 0                           | ( 0.00%) |
| <b>N_Stage</b>     |                        |          |                              |          |                             |          |
| N0                 | 149                    | (45.02%) | 73                           | (43.98%) | 76                          | (46.06%) |
| N1                 | 13                     | ( 3.93%) | 7                            | ( 4.22%) | 6                           | ( 3.64%) |
| NX                 | 169                    | (51.06%) | 86                           | (51.81%) | 83                          | (50.30%) |
| <b>M_Stage</b>     |                        |          |                              |          |                             |          |
| NA                 | 1                      | ( 0.30%) | 1                            | ( 0.60%) | 0                           | ( 0.00%) |
| M0                 | 262                    | (79.15%) | 123                          | (74.10%) | 139                         | (84.24%) |
| M1                 | 51                     | (15.41%) | 34                           | (20.48%) | 17                          | (10.30%) |
| MX                 | 17                     | ( 5.14%) | 8                            | ( 4.82%) | 9                           | ( 5.45%) |
| <b>Stage</b>       |                        |          |                              |          |                             |          |
| NR                 | 3                      | ( 0.91%) | 2                            | ( 1.20%) | 1                           | ( 0.61%) |
| Stage I            | 156                    | (47.13%) | 62                           | (37.35%) | 94                          | (56.97%) |
| Stage II           | 34                     | (10.27%) | 16                           | ( 9.64%) | 18                          | (10.91%) |
| Stage III          | 85                     | (25.68%) | 50                           | (30.12%) | 35                          | (21.21%) |
| Stage IV           | 53                     | (16.01%) | 36                           | (21.69%) | 17                          | (10.30%) |
| <b>OS</b>          |                        |          |                              |          |                             |          |
| Mean               | 1340.29                |          | 1191.33                      |          | 1490.15                     |          |
| median             | 1218.00                |          | 1138.50                      |          | 1314.00                     |          |
| <b>Age</b>         |                        |          |                              |          |                             |          |
| ≤60                | 160                    | (48.34%) | 81                           | (48.80%) | 79                          | (47.88%) |
| >60                | 171                    | (51.66%) | 85                           | (51.20%) | 86                          | (52.12%) |
| <b>Gender</b>      |                        |          |                              |          |                             |          |
| Female             | 114                    | (34.44%) | 49                           | (29.52%) | 65                          | (39.39%) |
| Male               | 217                    | (65.56%) | 117                          | (70.48%) | 100                         | (60.61%) |
